# Supplementary material
Source: bioRxiv or medRxiv preprint supplement (https://www.biorxiv.org/highwire/filestream/83314/field_highwire_adjunct_files/5/271361-6.pdf)

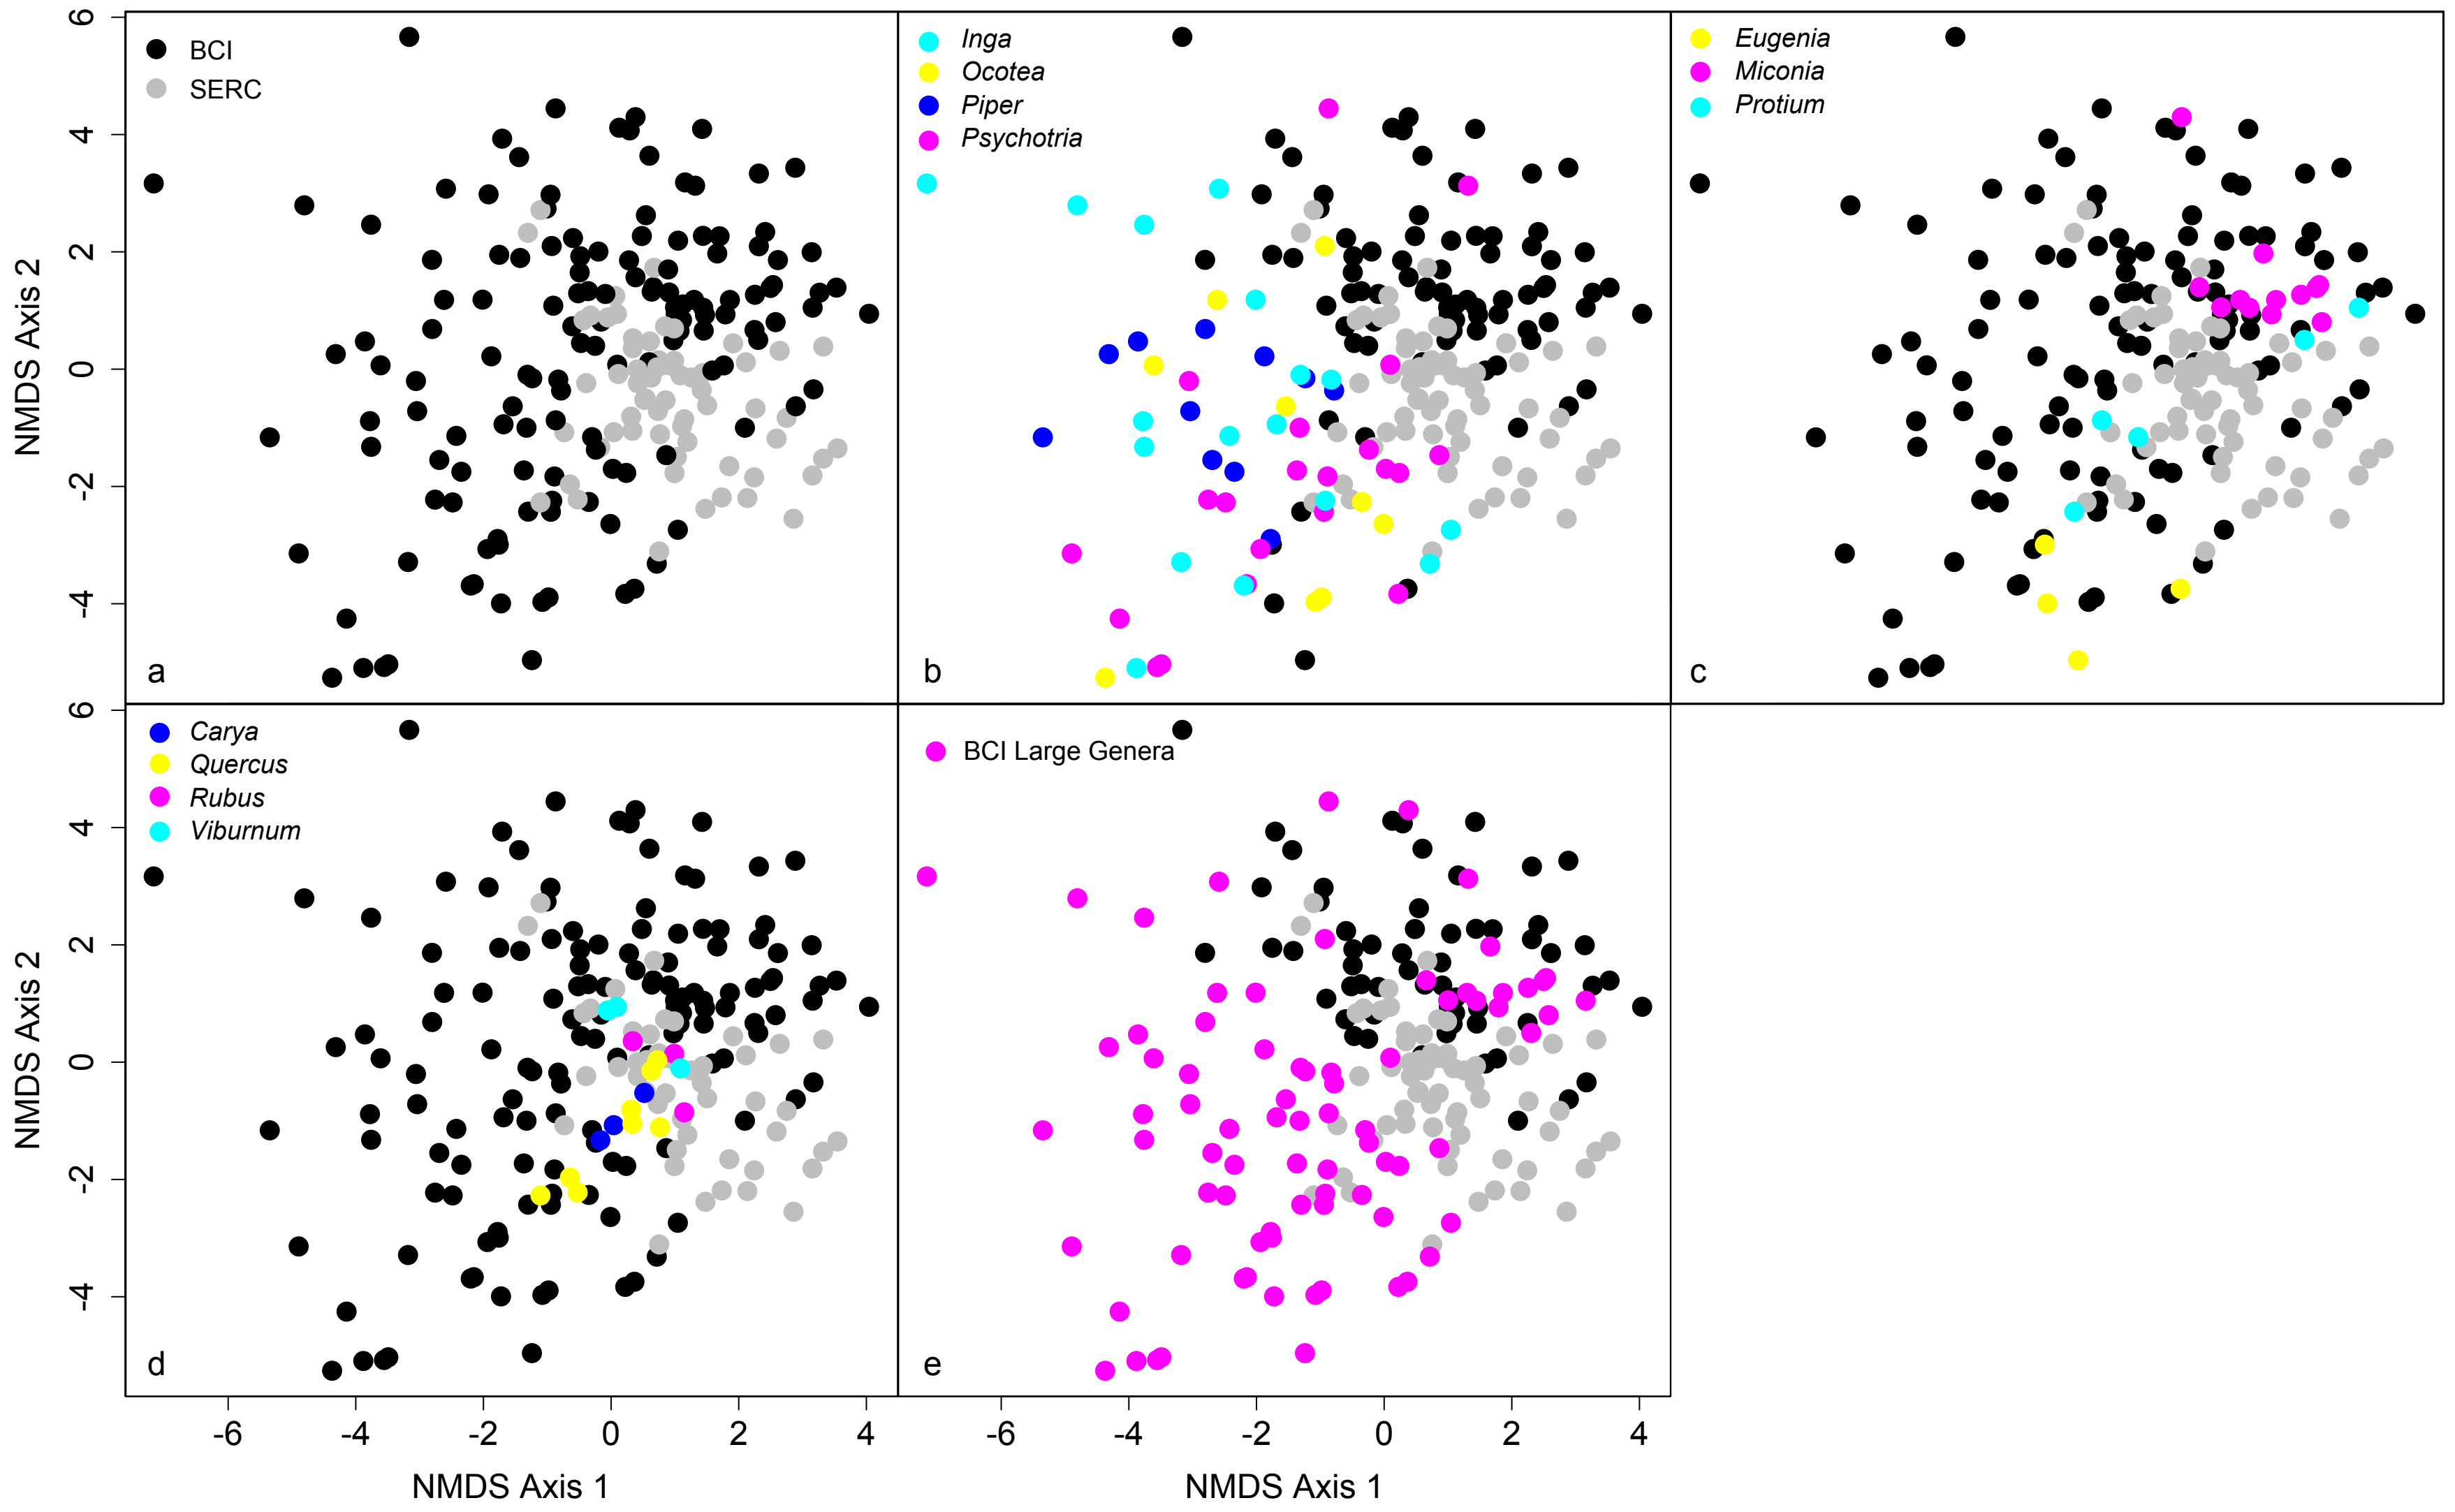

Supplement: Supplementary file [file 271361-6.pdf]
